# Supplementary material
Source: Springer Nature journal article supplement (https://www.springermedizin.de/resource/supplementary/12885_2008_1558_MOESM7_ESM.pdf/9472316)

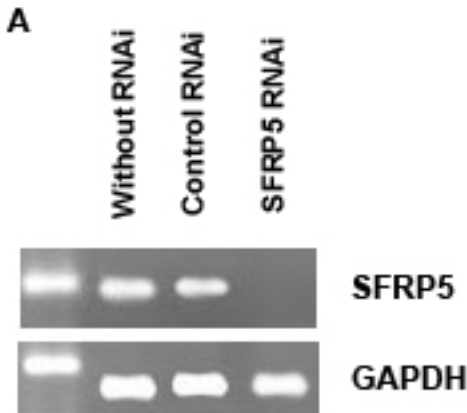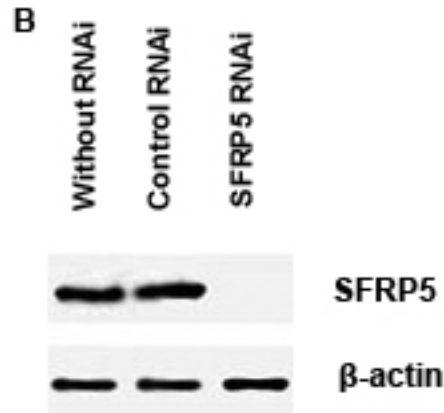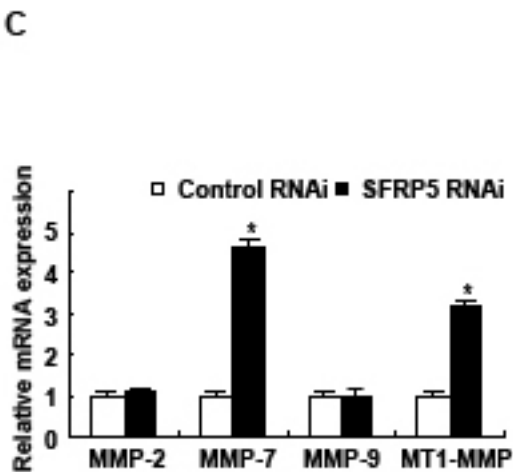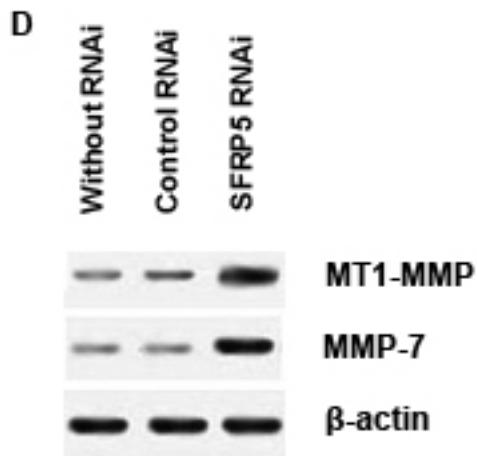

Supplement: MOESM7 [file 9472316]
